# Supplementary material
Source: publisher figshare collection journal article supplement (https://tandf.figshare.com/ndownloader/files/12404372)
Supplement: Supplementary file 1 [file 12404372]

# **Appendix A**

**Our extensive field observations have captured** data for water temperature at benthic and subsurface levels (yellow triangles and green stars respectively; Figure A1) throughout the harbour, except for the Inner Harbour, where due to harbour navigational restrictions we were limited to the periphery. In addition, we measured the temperature of the water column in several strategic locations (red dots in 2013 and blue squares in 2015; Figure A1), the water current velocities with acoustic Doppler profilers (green triangles; Figure A1) and water levels (brown arrows; Figure A1).

# **
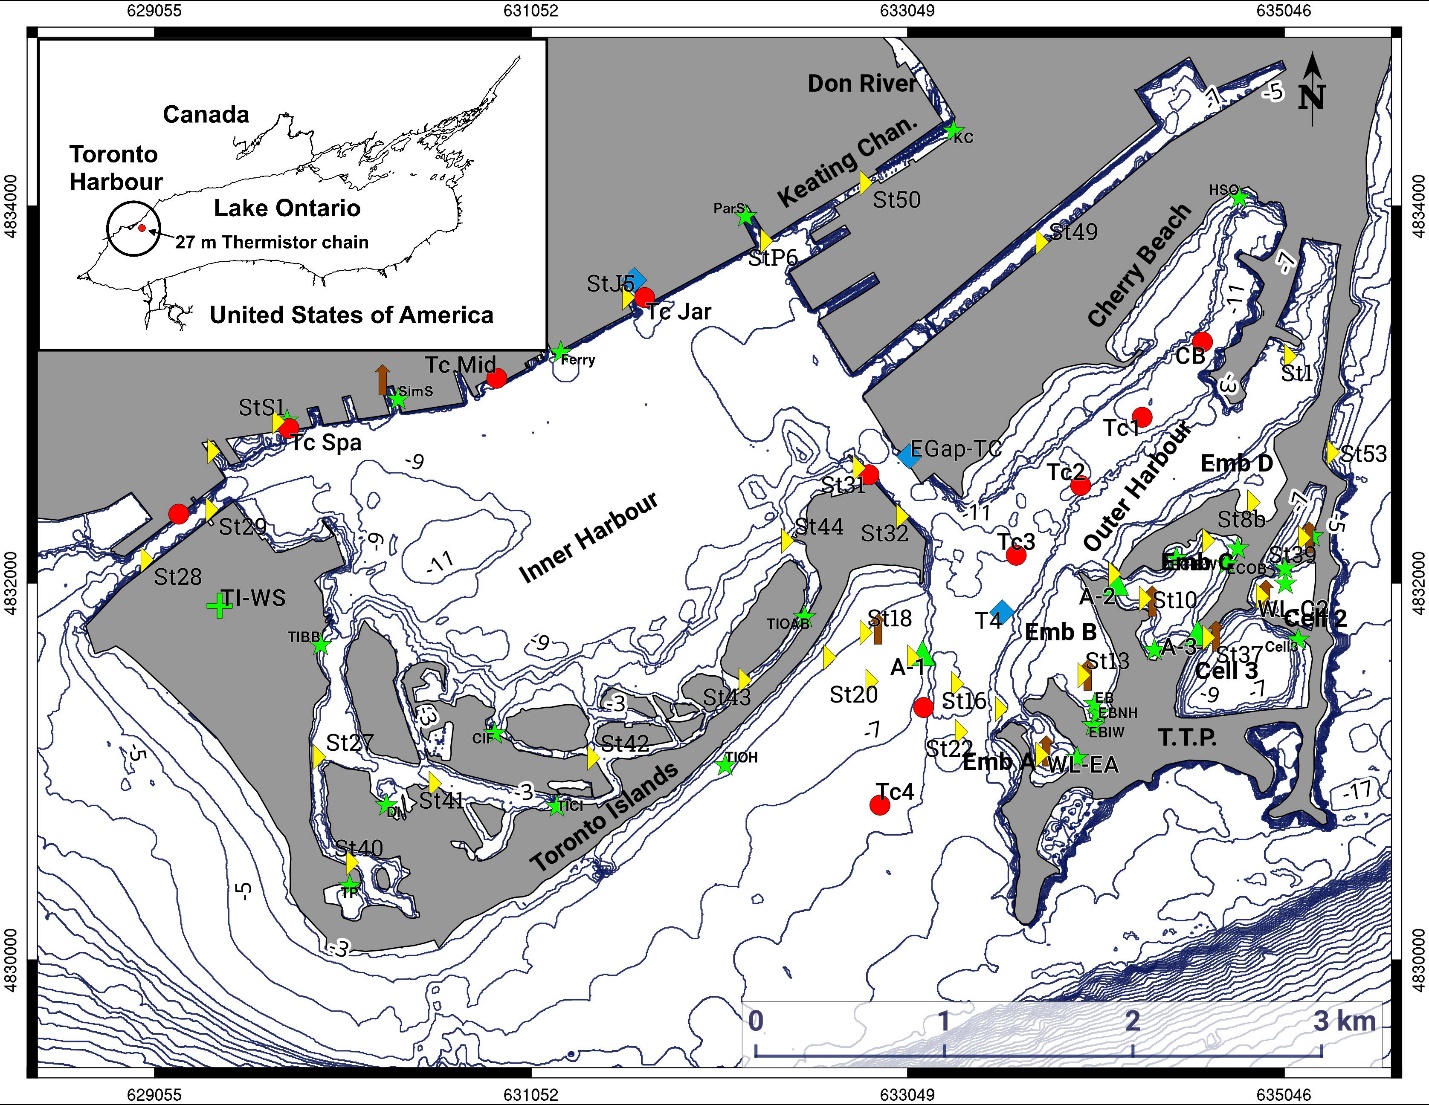
**

**Figure A1.** Map and bathymetry of Toronto Harbour and north-western Lake Ontario. The blue diamonds mark the temperature chains deployments in 2015. The other placemarks locate the instruments deployed in 2013. The red dots mark the temperature chains. The brown arrows mark the pressure loggers. The green stars mark the subsurface temperature loggers. The green triangles mark the acoustic Doppler current profilers. The yellow triangles mark the bottom temperature logger deployments. A 27m long temperature chain has been deployed 5 km offshore in Lake Ontario to capture the temperature water column in Lake Ontario. The Environment Canada weather station is marked with a green cross.

**Meteorological observations**

The mean monthly air temperatures measured at the Toronto City Airport station (ID 6158359; 43° 37’ 39” N, 79° 23’ 46” W) closely follow the lake surface temperatures. For 2013 the meteorological records of Environment Canada show that the mean summer air temperature in mean air temperatures in April and May are 7 and 14°C, in July and August were 23°C, and in September and October were 18 and 12°C, respectively. Wind observations at the same station (observed at 10 m above the ground) during the observed period are depicted in Figure A1. Winds are predominately southwesterly and westerly during winter and summer. The southwesterly winds were dominant during the study period with an average speed of 3.7 m s-1. However, wind direction often changed and long spells of northeasterly winds were not uncommon. The largest wind velocities that exceeded 12 m s-1 were present only 0.2% of the time. The wind speeds were highest in spring and autumn with means of 5.1 m s-1, and there were lower mean wind speeds of 3.7 m s-1 during the summer months. Fluctuations between north-east and west with a typical period of 2 to 3 days were quite common during the summer months. In winter, winds with northerly components were common as are those with southerly components in summer. Autumn and spring winds were more variable.

#

Figure A2. A wind rose for the Environment Canada weather station at the Toronto City Airport (Figure A1), for the period between May 1 and October 30, 2013 (DOY 122-303). Direction indicated is that from which wind is blowing. Concentric rings give percentage of time wind is from that direction; colours within each wedge represent the proportion of time winds from that direction are of a certain magnitude.

**Figure A3.** Current Rose plots (magnitude [m s-1] and direction) at A-1 in 2013: (a) 1 m and (b) 6 m.


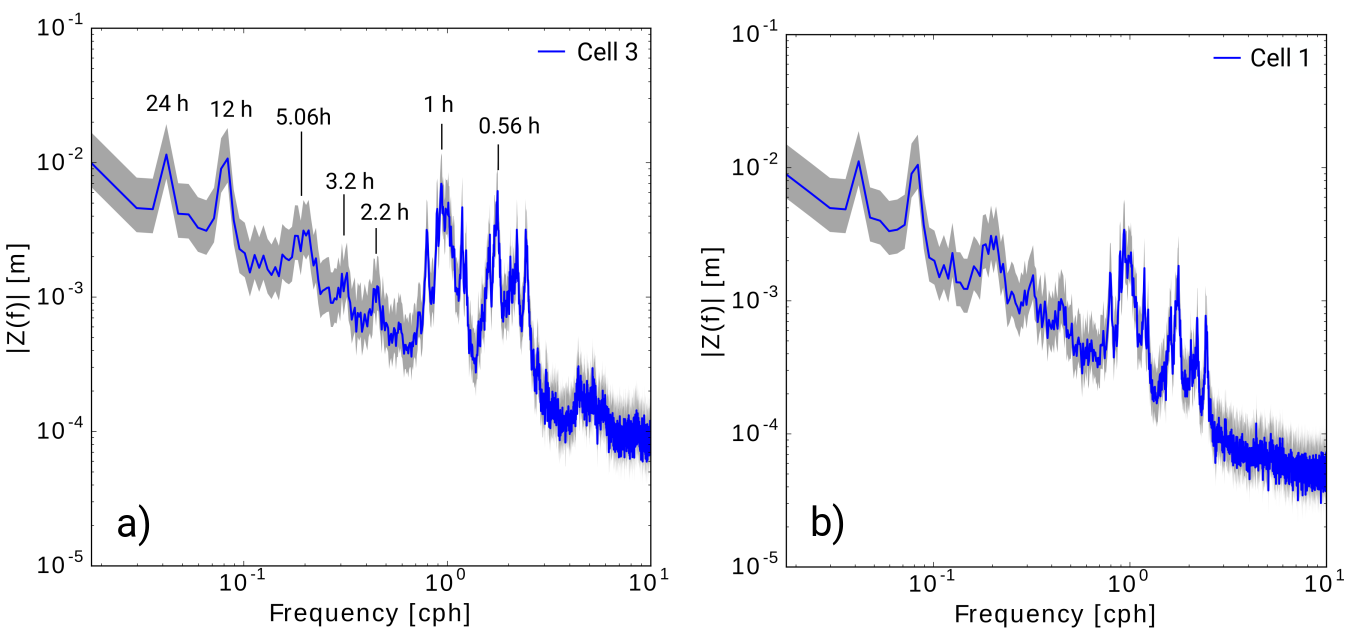


**Figure A4.** Spectral analysis of water level time-series at two locations in Tommy Thompson Park during 25 June 2013 - 16 August 2013 (DOY 176-228). a) Cell 3. b) Cell 1. The gray shadings represent the 95% confidence intervals. The prominent peaks that match water level oscillations known from literature have been labelled

**
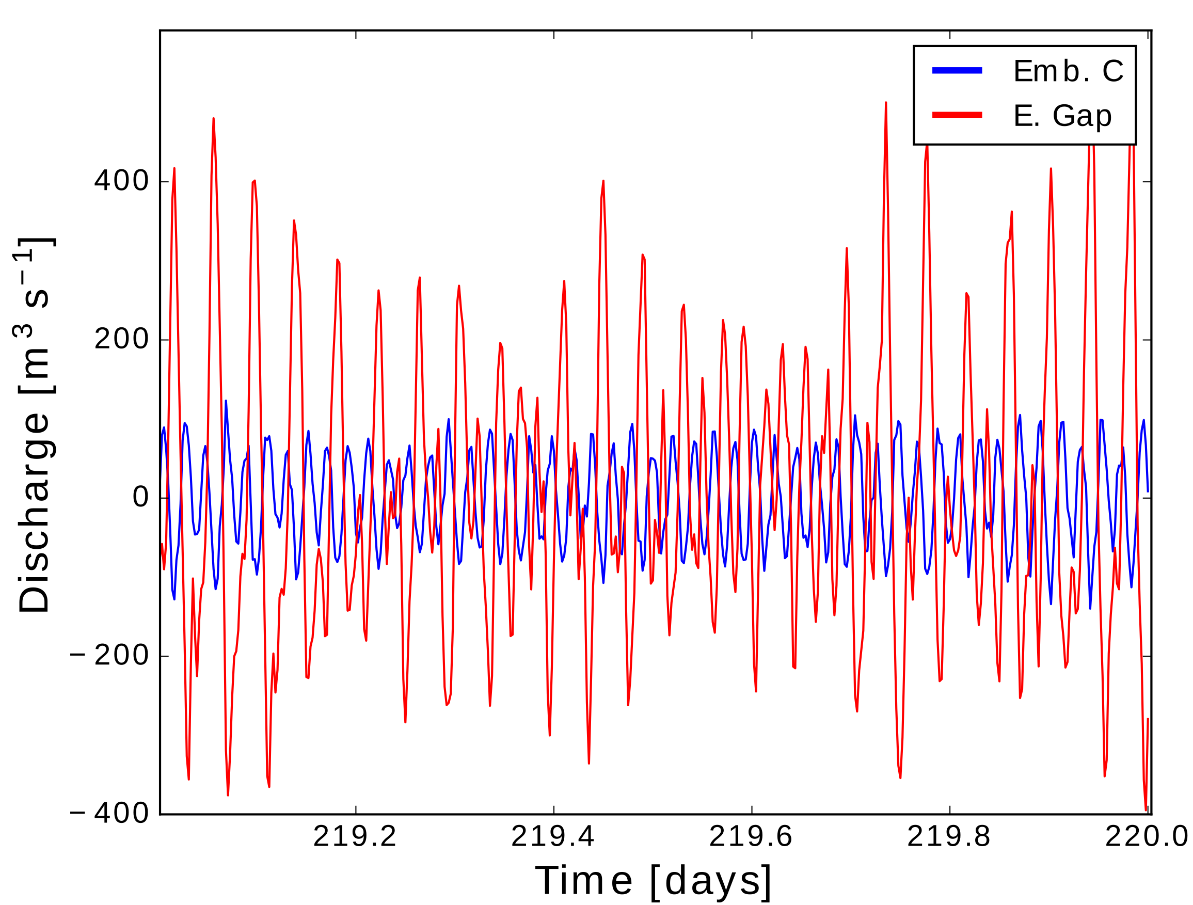
**

Figure A5. Discharge in the Eastern Gap and Embayment C obtained by the Delft3D-Flexible Mesh model.
